# Supplementary material
Source: Springer Nature journal article supplement (https://www.springerprofessional.de/resource/supplementary/13688_2012_9_MOESM10_ESM.pdf/11893932)

weekday

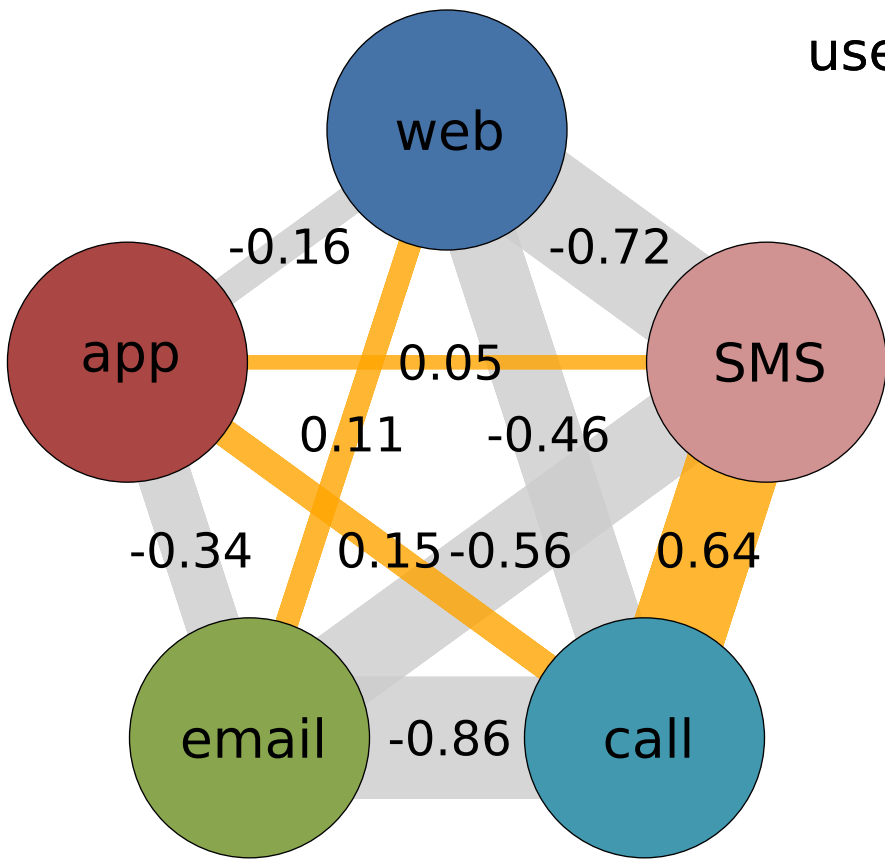

weekend

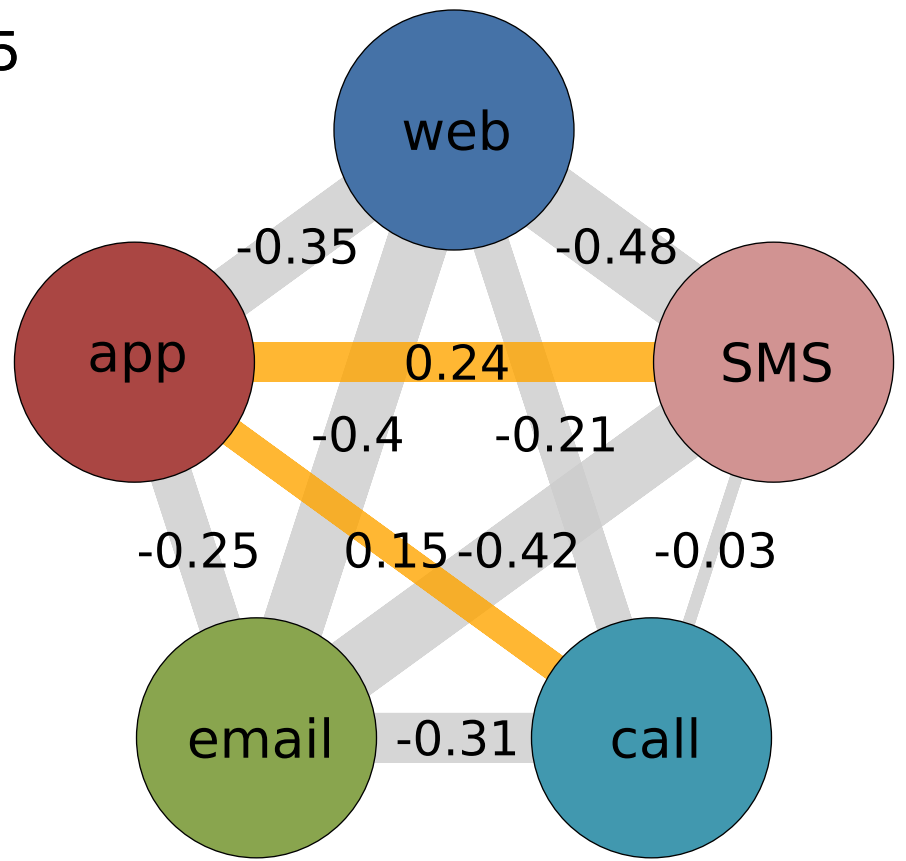

user 81

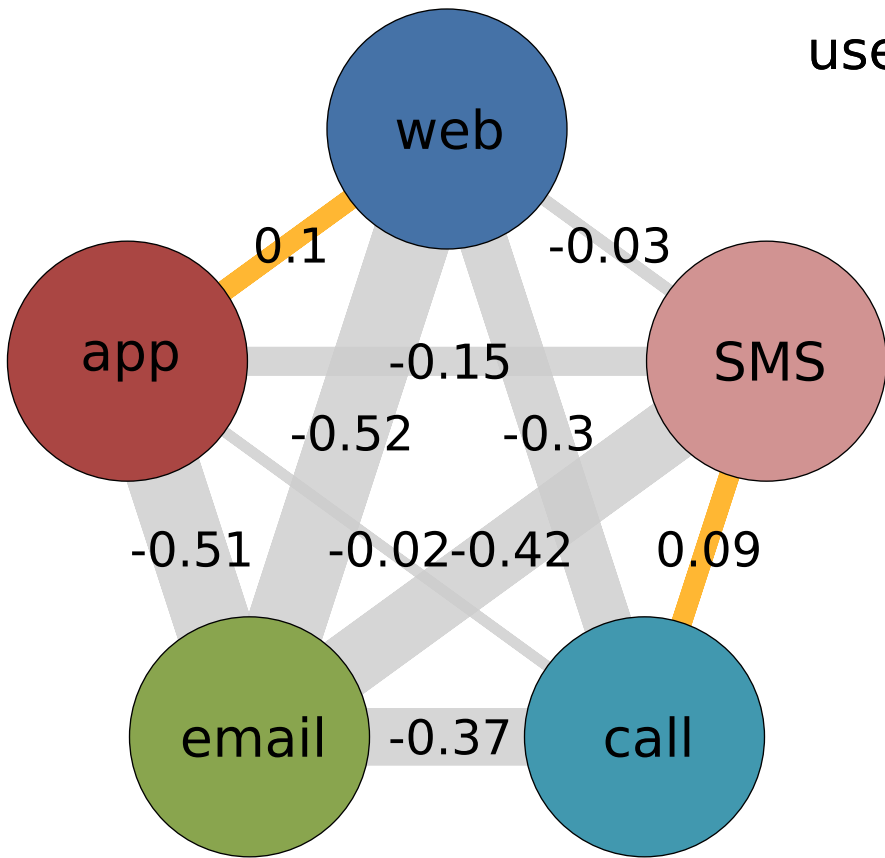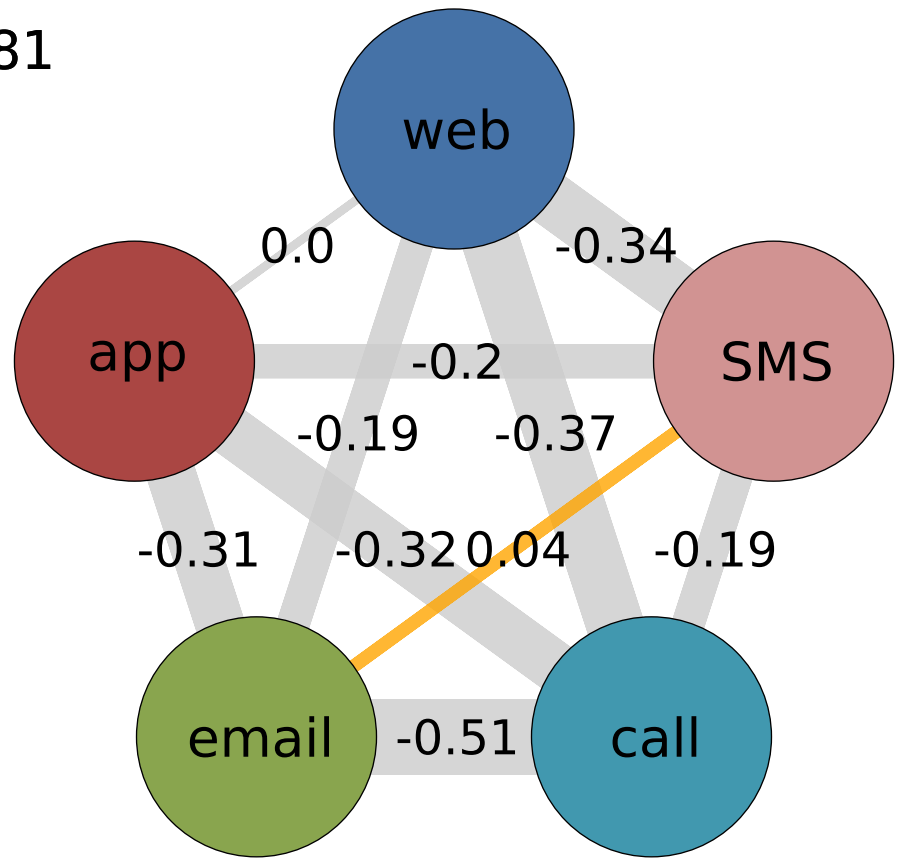

all users

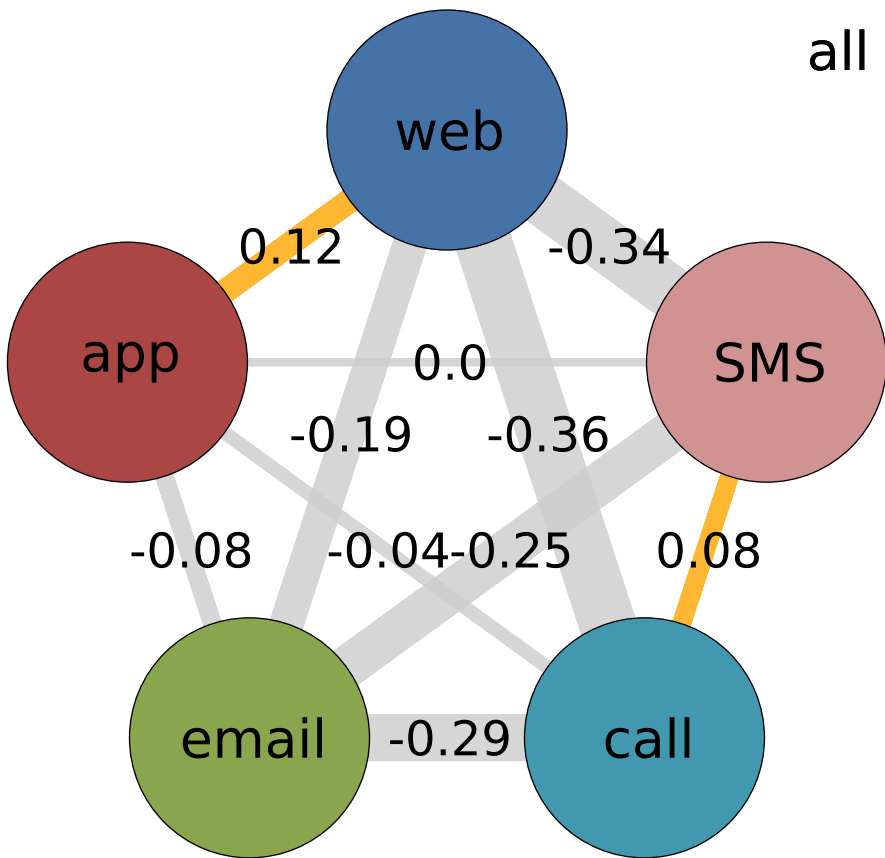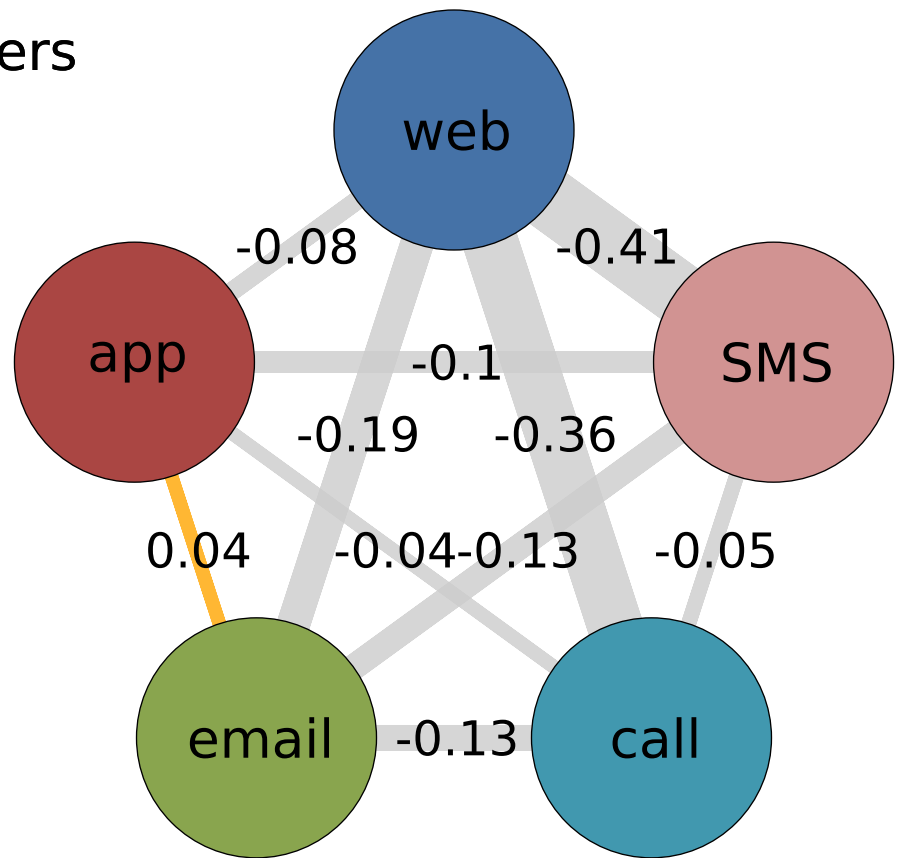

Supplement: MOESM10 [file 11893932]
